# Supplementary material
Source: Research Square preprint supplement (doi:10.21203/rs.3.rs-9290673/v1)
Supplement: Supplementary file 1 [file 55e22c00ea4dfdc80934a945.pdf]

## Interview Excerpts

**P1 (Employee)**

“The system helps me monitor my performance regularly, but it sometimes ignores teamwork aspects.”

**P2 (Manager)**

“I rely on the system for efficiency, but I still need to interpret the data for my team.”

**P3 (Employee)**

“Being involved in setting targets makes me more motivated to achieve them.”

**P4 (Manager)**

“Some employees struggle because they lack digital skills.”

**P5 (Employee)**

“The transparency is good, but it also feels like constant monitoring.”

**P6 (Employee)**

“I appreciate the real-time feedback because I can improve faster.”

**P7 (Manager)**

“The system reduces paperwork significantly.”

**P8 (Employee)**

“I feel more engaged when I can give input into the evaluation process.”

**P9 (Manager)**

“Not all employees are comfortable using digital platforms.”

**P10 (Employee)**

“Sometimes the system focuses too much on numbers.”

**P11 (Employee)**

“It helps me understand my performance clearly.”

**P12 (Manager)**

“I act as a bridge between the system and employees.”

**P13 (Employee)**

“I like that everything is transparent and accessible.”

**P14 (Manager)**

“Resistance to change is still a big issue.”

**P15 (Employee)**

“I feel more responsible when I am involved in the process.”

**P16 (Manager)**

“Digital tools help me give faster feedback.”

**P17 (Employee)**

“I worry about data privacy in the system.”

**P18 (Manager)**

“Training is necessary for employees to adapt.”

**P19 (Employee)**

“The system is useful but not perfect.”

**P20 (Manager)**

“Balancing technology and human interaction is challenging.”

| Participant | Summary                            | Code  | Category        | Theme                     |
|-------------|------------------------------------|-------|-----------------|---------------------------|
| P1          | Focus on metrics                   | DPE3  | Limitation      | Digital Challenges        |
| P2          | Manager explains data              | FLM2  | Interpretation  | Manager Role              |
| P3          | Participation increases motivation | HRCC1 | Engagement      | HR Co-Creation            |
| P4          | Lack of digital skills             | CH1   | Barrier         | Implementation Challenges |
| P5          | Transparency vs monitoring         | CH3   | Concern         | Digital Challenges        |
| P6          | Real-time feedback                 | DPE2  | Efficiency      | Digitalization Benefits   |
| P7          | Reduced admin work                 | DPE2  | Efficiency      | Digitalization Benefits   |
| P8          | Employee involvement               | HRCC1 | Engagement      | HR Co-Creation            |
| P9          | Tech discomfort                    | CH1   | Barrier         | Implementation Challenges |
| P10         | Over-reliance on numbers           | DPE3  | Limitation      | Digital Challenges        |
| P11         | Clear performance understanding    | DPE1  | Transparency    | Digitalization Benefits   |
| P12         | Manager as bridge                  | FLM2  | Interpretation  | Manager Role              |
| P13         | Accessible data                    | DPE1  | Transparency    | Digitalization Benefits   |
| P14         | Resistance to change               | CH2   | Barrier         | Implementation Challenges |
| P15         | Ownership feeling                  | HRCC2 | Engagement      | HR Co-Creation            |
| P16         | Faster feedback                    | DPE2  | Efficiency      | Digitalization Benefits   |
| P17         | Privacy concern                    | CH3   | Concern         | Digital Challenges        |
| P18         | Need for training                  | CH1   | Barrier         | Implementation Challenges |
| P19         | System limitation                  | DPE3  | Limitation      | Digital Challenges        |
| P20         | Human-tech balance                 | FLM1  | Role Complexity | Manager Role              |

| <b>Code</b>                     | <b>Frequency</b> |
|---------------------------------|------------------|
| DPE1 (Transparency)             | 3                |
| DPE2 (Efficiency)               | 4                |
| DPE3 (Data-driven / limitation) | 4                |
| HRCC1 (Participation)           | 2                |
| HRCC2 (Ownership)               | 1                |
| FLM1 (Coaching role)            | 1                |
| FLM2 (Interpretation role)      | 3                |
| CH1 (Digital literacy gap)      | 4                |
| CH2 (Resistance to change)      | 1                |
| CH3 (Privacy concern)           | 2                |
